# Supplementary material for: Injectable alginate-microencapsulated canine adipose tissue-derived mesenchymal stem cells for enhanced viable cell retention
Source: PubMed Central journal article supplement — J Vet Med Sci. 2017 Jan 6;79(3):492–501. doi: 10.1292/jvms.16-0456 (PMC5383167; doi:10.1292/jvms.16-0456), 2017-01-06
Supplement: jvms-79-492-s001.pdf [file jvms-79-492-s001.pdf]

**SUPPLEMENTARY TABLE**

Supplementary Table 1.

Hematology comparing the control group and the alginate microcapsule-injected group.

|         | Time<br>(days) | PLT<br>(x10 <sup>3</sup> cells/ul) | WBC<br>(x10 <sup>3</sup> cells/ul) | RBC<br>(x10 <sup>6</sup> cells/ul) | HGB<br>(g/dl)   | HCT<br>(%)      | WBC Differential Counting (%) |                 |                |                |                |
|---------|----------------|------------------------------------|------------------------------------|------------------------------------|-----------------|-----------------|-------------------------------|-----------------|----------------|----------------|----------------|
|         |                |                                    |                                    |                                    |                 |                 | Neut                          | Lymph           | Mono           | Eos            | Baso           |
| Control | 0              | 1032.33 ±<br>173.17                | 7.22 ±<br>0.73                     | 6.86 ±<br>0.29                     | 16.60 ±<br>0.94 | 41.95 ±<br>0.90 | 8.52 ±<br>0.81                | 88.13 ±<br>0.57 | 1.62 ±<br>0.29 | 0.67 ±<br>0.14 | 0.38 ±<br>0.08 |
|         | 7              | 1215.67 ±<br>142.38                | 7.12 ±<br>1.30                     | 6.43 ±<br>0.48                     | 17.00 ±<br>0.81 | 41.35 ±<br>2.74 | 8.53 ±<br>2.71                | 87.70 ±<br>2.47 | 1.58 ±<br>0.37 | 0.63 ±<br>0.25 | 0.30 ±<br>0.13 |
|         | 14             | 1356.50 ±<br>127.32                | 9.06 ±<br>1.12                     | 6.79 ±<br>0.25                     | 17.12 ±<br>0.42 | 43.43 ±<br>1.62 | 8.47 ±<br>1.40                | 87.05 ±<br>1.93 | 1.77 ±<br>0.26 | 0.50 ±<br>0.23 | 0.37 ±<br>0.08 |
| Treat   | 0              | 1015.29 ±<br>84.33                 | 7.58 ±<br>1.07                     | 6.16 ±<br>0.90                     | 17.51 ±<br>0.50 | 40.01 ±<br>4.52 | 8.76 ±<br>0.63                | 87.66 ±<br>0.66 | 1.97 ±<br>0.52 | 0.73 ±<br>0.13 | 0.37 ±<br>0.16 |
|         | 7              | 1214.86 ±<br>297.07                | 7.83 ±<br>2.83                     | 6.06 ±<br>1.36                     | 16.44 ±<br>3.58 | 40.64 ±<br>9.42 | 11.30<br>± 4.34               | 83.79 ±<br>4.83 | 2.07 ±<br>0.62 | 1.41 ±<br>2.04 | 0.34 ±<br>0.10 |
|         | 14             | 1319.29 ±<br>147.43                | 9.59 ±<br>2.27                     | 6.61 ±<br>0.25                     | 17.04 ±<br>0.51 | 41.87 ±<br>1.48 | 10.16<br>± 3.12               | 83.67 ±<br>4.93 | 2.44 ±<br>0.58 | 0.47 ±<br>0.17 | 0.31 ±<br>0.07 |

Supplementary Table 2.

Serology comparing the control group and the alginate microcapsule-injected group.

|         | Time (days) | BUN mg/dl    | ALB g/dl    | CREA mg/dl  | T-BIL mg/dl | GLU mg/dl      | TG mg/dl       | CHO mg/dl    | GOT u/l        | GPT u/l       | ALP u/l         | GGT u/l     | TP g/dl     |
|---------|-------------|--------------|-------------|-------------|-------------|----------------|----------------|--------------|----------------|---------------|-----------------|-------------|-------------|
| Control | 0           | 13.00 ± 2.10 | 3.58 ± 0.04 | 0.53 ± 0.05 | 0.60 ± 0.15 | 155.17 ± 11.16 | 144.33 ± 32.25 | 89.67 ± 6.80 | 93.50 ± 9.09   | 47.00 ± 5.69  | 737.83 ± 141.45 | 1.83 ± 0.41 | 7.47 ± 0.90 |
|         | 7           | 16.50 ± 2.17 | 4.05 ± 0.23 | 0.62 ± 0.04 | 0.78 ± 0.13 | 163.00 ± 13.62 | 184.33 ± 50.22 | 88.83 ± 4.75 | 149.00 ± 38.08 | 47.00 ± 10.68 | 636.00 ± 154.27 | 2.00 ± 0.63 | 9.07 ± 0.50 |
|         | 14          | 16.50 ± 2.81 | 4.22 ± 0.26 | 0.72 ± 0.08 | 0.68 ± 0.22 | 153.50 ± 11.98 | 159.67 ± 62.71 | 82.67 ± 9.69 | 151.83 ± 27.43 | 46.17 ± 7.05  | 635.00 ± 91.56  | 2.17 ± 0.75 | 9.13 ± 0.65 |
| Treat   | 0           | 14.29 ± 1.50 | 3.76 ± 0.08 | 0.53 ± 0.08 | 0.54 ± 0.18 | 162.43 ± 11.41 | 101.86 ± 21.97 | 93.43 ± 9.14 | 90.00 ± 11.11  | 51.00 ± 7.14  | 842.86 ± 104.68 | 2.43 ± 0.79 | 8.06 ± 0.61 |
|         | 7           | 14.86 ± 1.77 | 4.16 ± 0.24 | 0.61 ± 0.04 | 0.87 ± 0.12 | 148.43 ± 17.01 | 183.14 ± 44.10 | 85.71 ± 6.55 | 128.57 ± 21.52 | 48.00 ± 7.66  | 749.86 ± 106.80 | 1.29 ± 0.76 | 9.27 ± 0.95 |
|         | 14          | 16.00 ± 2.52 | 4.09 ± 0.33 | 0.61 ± 0.09 | 0.56 ± 0.09 | 162.43 ± 16.51 | 142.00 ± 32.38 | 70.29 ± 9.09 | 128.29 ± 21.66 | 40.57 ± 9.27  | 644.43 ± 111.88 | 1.43 ± 0.53 | 8.41 ± 0.83 |
